# Supplementary material for: Effect of cyclodextrin complexation on phenylpropanoids’ solubility and antioxidant activity
Source: publisher site journal article supplement (doi:10.3762/bjoc.10.241), 2014-10-06
Supplement: Additional file 1 [file 1860-5397-10-241-S1.pdf]

# Supporting Information

for

## Effect of cyclodextrin complexation on phenylpropanoids' solubility and antioxydant activity

Miriana Kfoury<sup>1,2,3</sup>, David Landy<sup>2,3</sup>, Lizette Auezova<sup>1</sup>, H el ene Greige-Gerges<sup>1</sup>

and Sophie Fourmentin<sup>2,3</sup> \*

Address: <sup>1</sup>Bioactive Molecules Research Group, Doctoral School of Science and Technology, Department of Chemistry and Biochemistry, Faculty of Sciences-2, Lebanese University, Lebanon, <sup>2</sup>Univ Lille Nord de France, F-59000 Lille, France and <sup>3</sup>ULCO, UCEIV, F-59140 Dunkerque, France

Email : Sophie Fourmentin - lamotte@univ-littoral.fr

\* Corresponding author

**Phase solubility profiles of CD inclusion complexes and most stable CD/PP inclusion complex conformers**

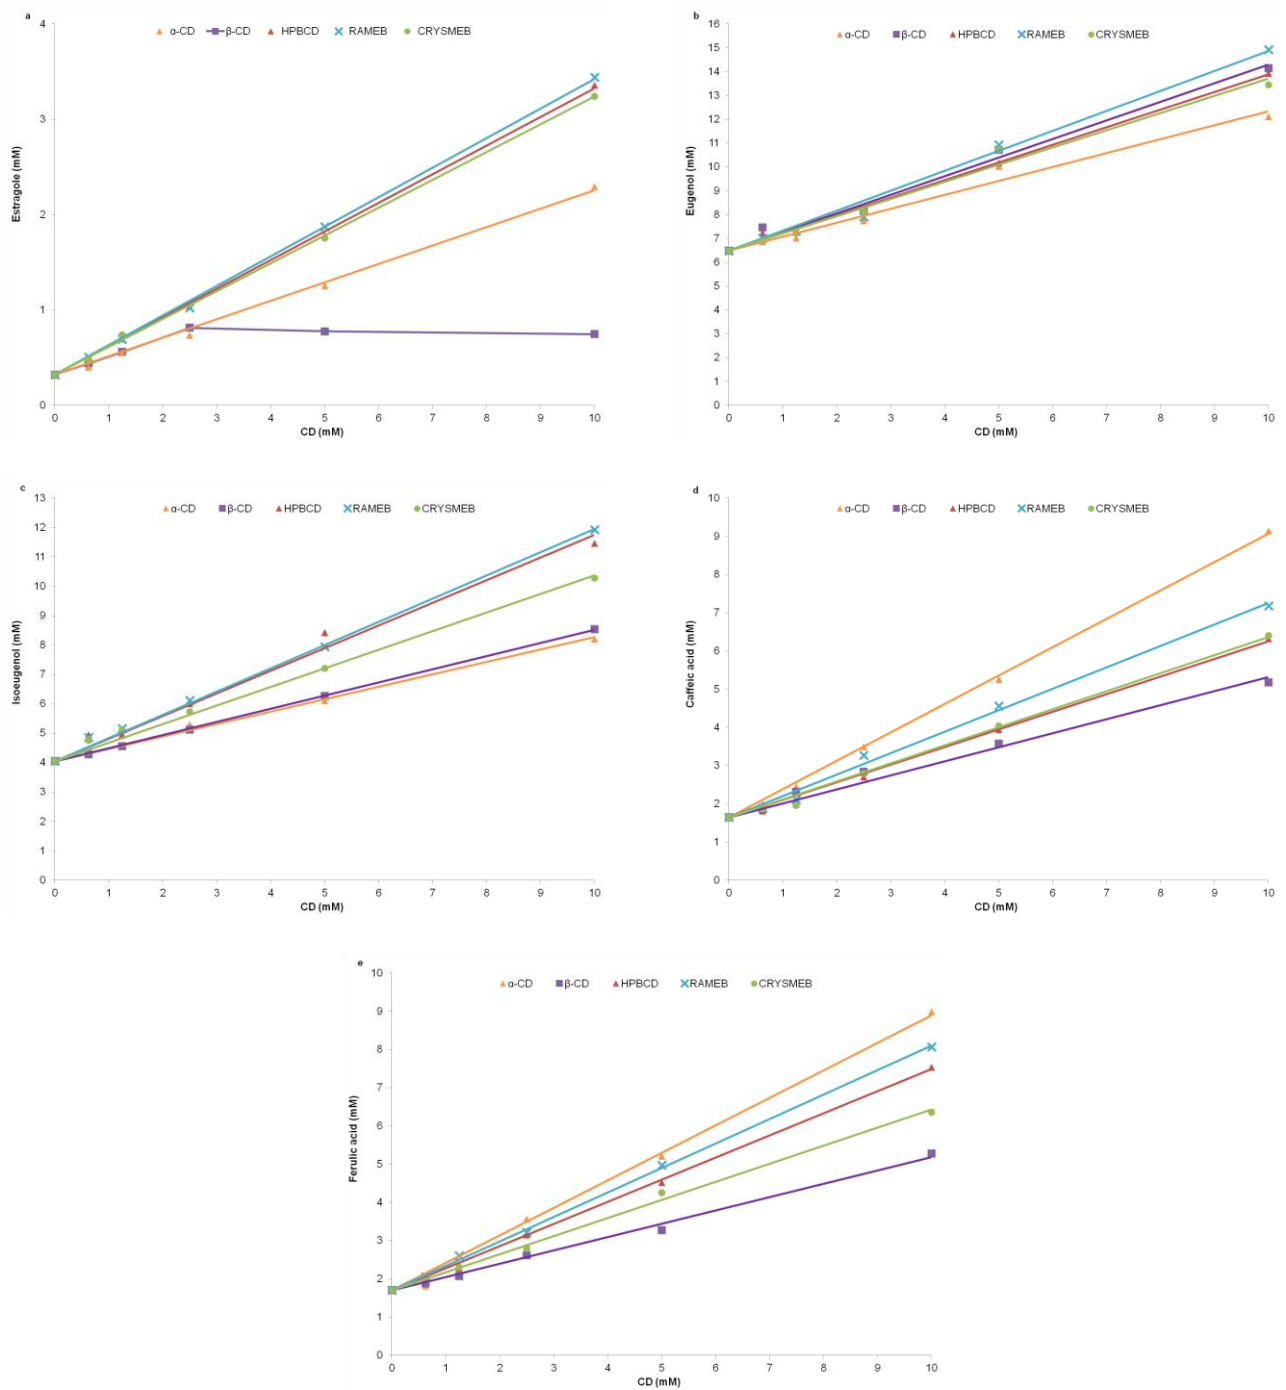

**Figure S1:** Phase solubility profiles of a) CD/estragole, b) CD/eugenol, c) CD/isoegenol, d) CD/caffeic acid and e) CD/ferulic acid inclusion complexes.

**Table S1:** Representation of the most stable CD/PP inclusion complex conformers resulting from the two docking strategies.

| Host/guest                               | $\Delta E$ (kJ/mol)                                                                          |                                                                                               |
|------------------------------------------|----------------------------------------------------------------------------------------------|-----------------------------------------------------------------------------------------------|
|                                          | Inclusion complex E1                                                                         | Inclusion complex E2                                                                          |
| $\beta$ -CD/<br>estragole                | 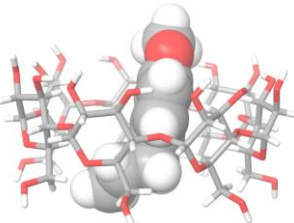<br>-46.0   | <br>-43.6   |
| $\beta$ -CD/<br>eugenol                  | <br>-45.2   | <br>-46.7   |
| $\beta$ -CD/<br>isoeugenol               | <br>-50.9  | <br>-49.9  |
| $\beta$ -CD/<br>caffeic acid             | <br>-33.3 | <br>-34.6 |
| $\beta$ -CD/ <i>p</i> -<br>coumaric acid | <br>-38.4 | <br>-38.8 |
| $\beta$ -CD/<br>ferulic acid             | <br>-32.2 | <br>-28.1 |
